# Supplementary material
Source: bioRxiv or medRxiv preprint supplement (https://www.biorxiv.org/highwire/filestream/74531/field_highwire_adjunct_files/0/243089-1.pdf)
Supplement: Supplementary file [file 243089-1.pdf]

# Supplementary Materials

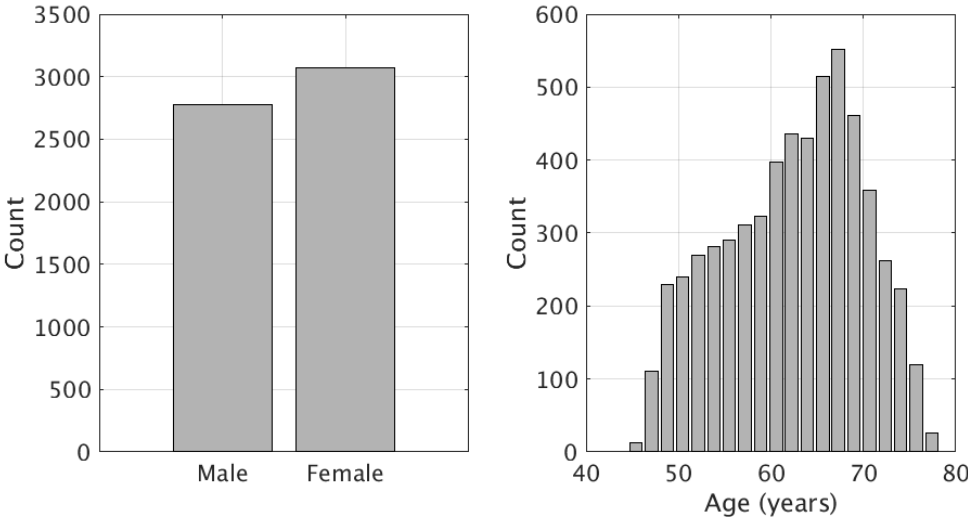

Supplementary Figure 1: Sex and age of subjects.

**Philoprogenitiveness  
(Lives with family)**

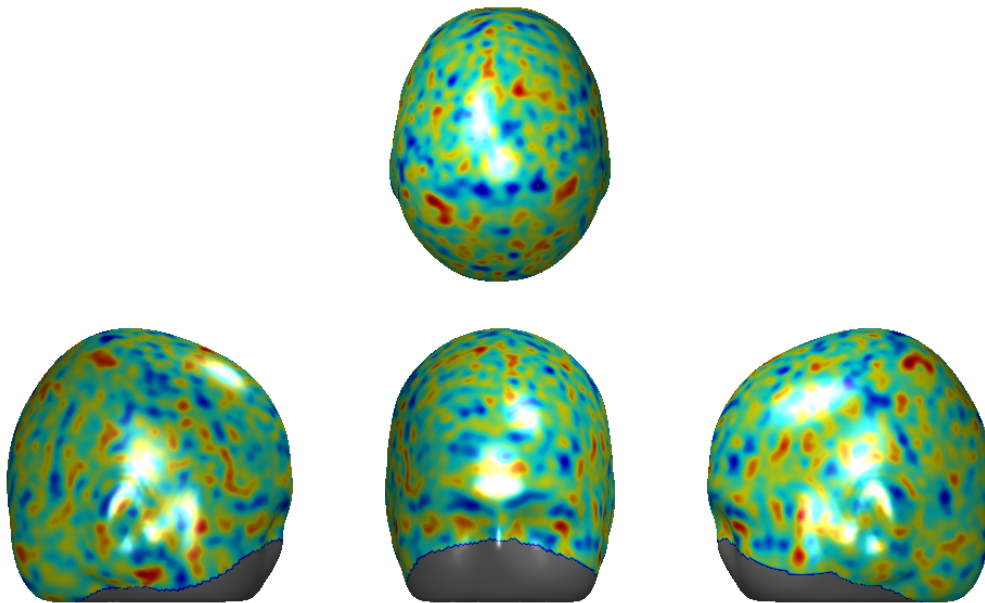

Supplementary Figure 2: Faculty II.

**Adhesiveness  
(Lives with non-family)**

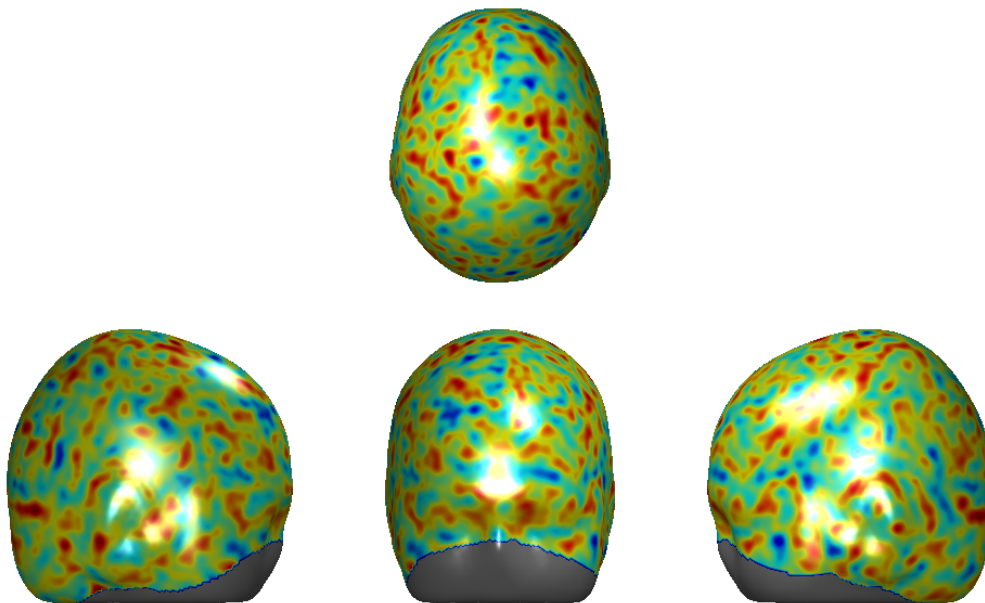

Supplementary Figure 3: Faculty III.

**Combativeness  
(Lawyer)**

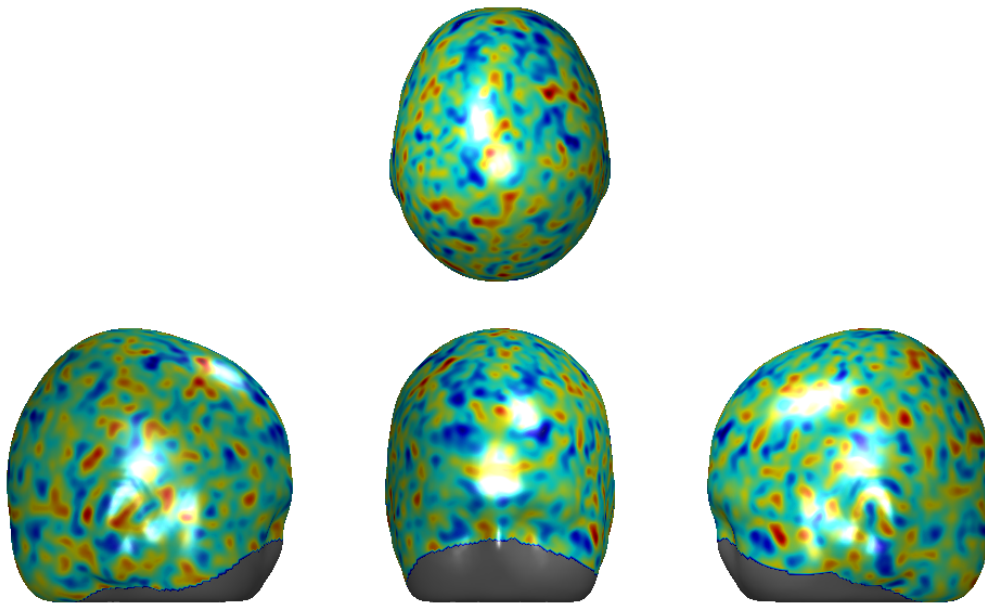

Supplementary Figure 4: Faculty IV.

**Destructiveness  
(Beef intake)**

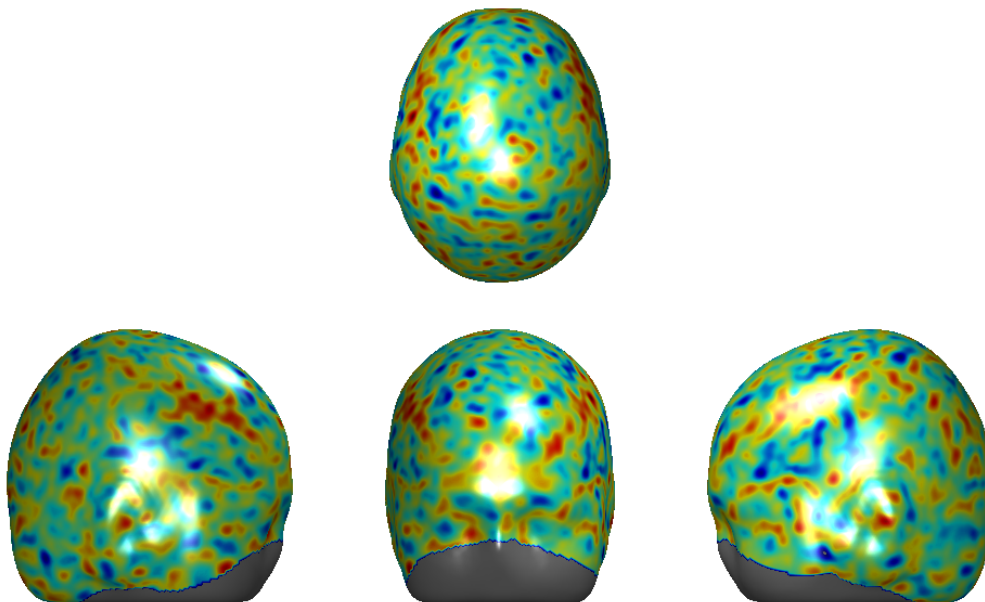

Supplementary Figure 5: Faculty V.

**Cunning  
(Scientist)**

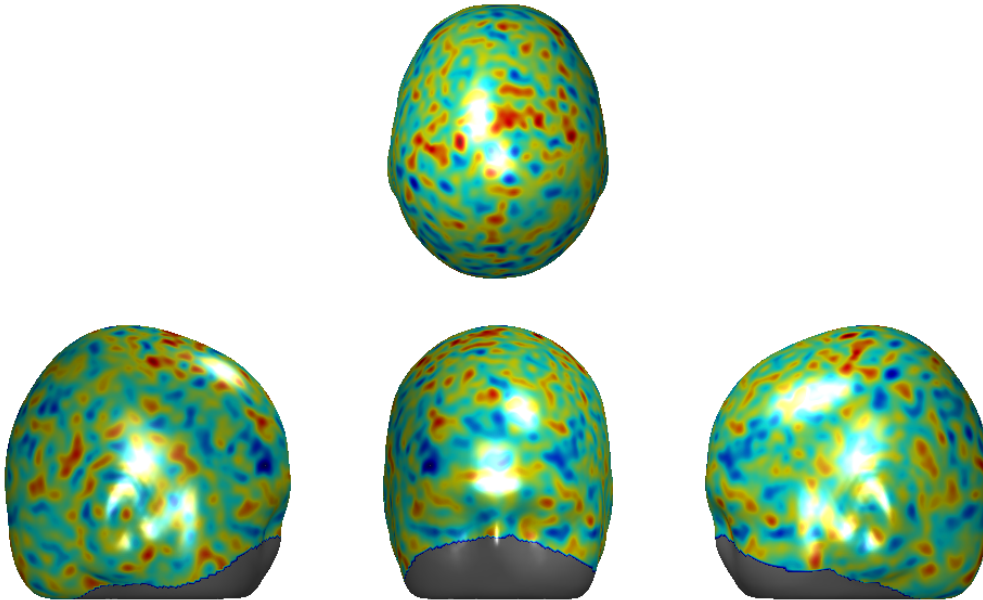

Supplementary Figure 6: Faculty VI.

**Acquisitiveness  
(Vehicles owned)**

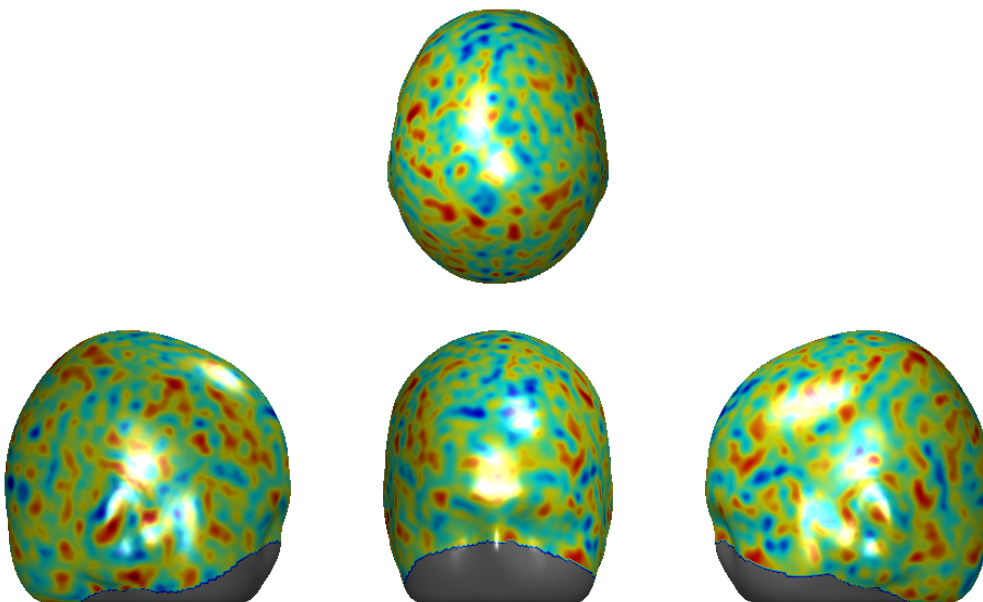

Supplementary Figure 7: Faculty VII.



**Self-Esteem  
(Banker)**

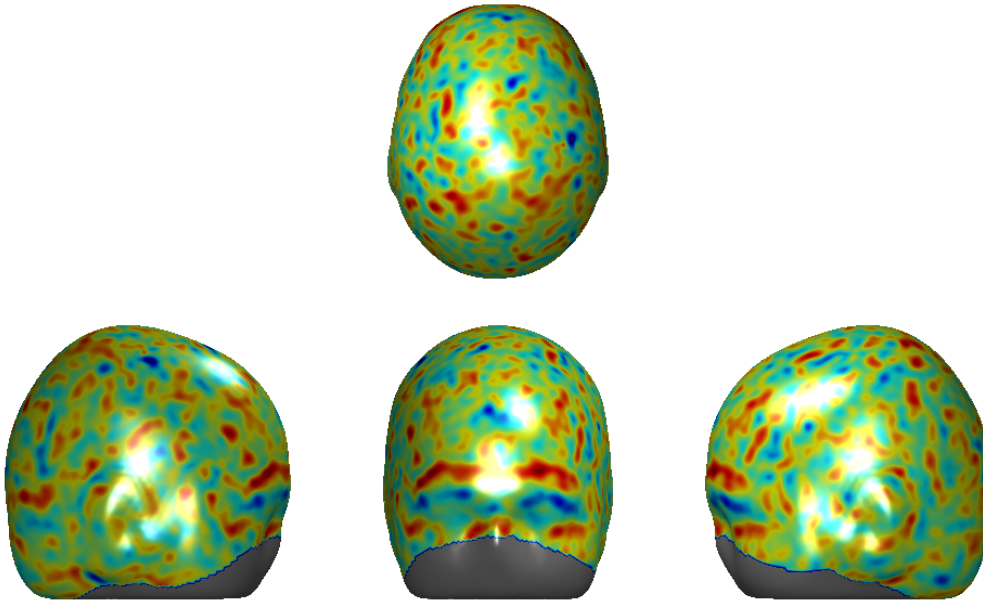

Supplementary Figure 8: Figure VIII.

**Love of Approbation  
(Financial satisfaction)**

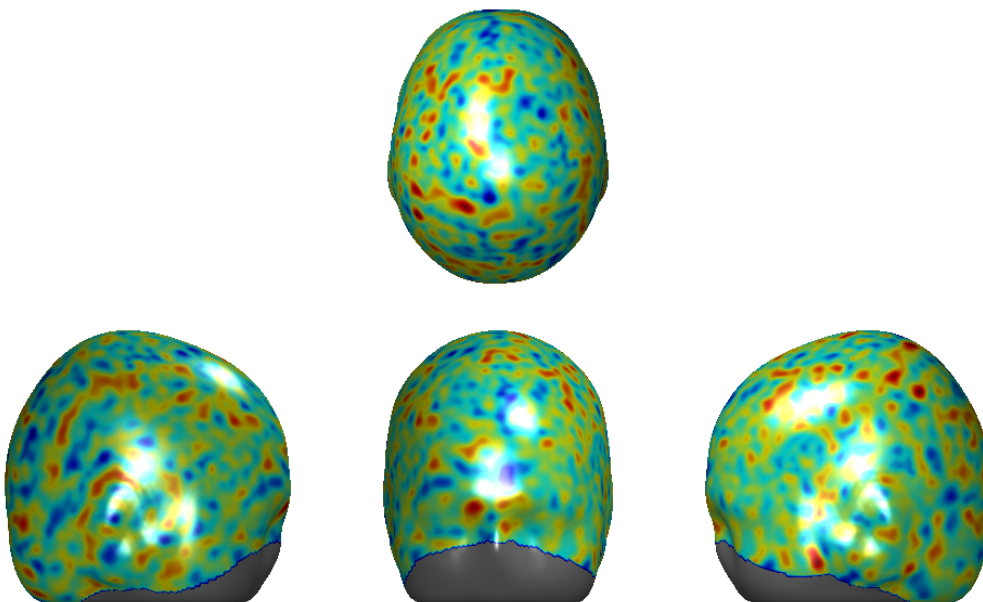

Supplementary Figure 9: Faculty IX.

**Cautiousness  
(Alcohol intake)**

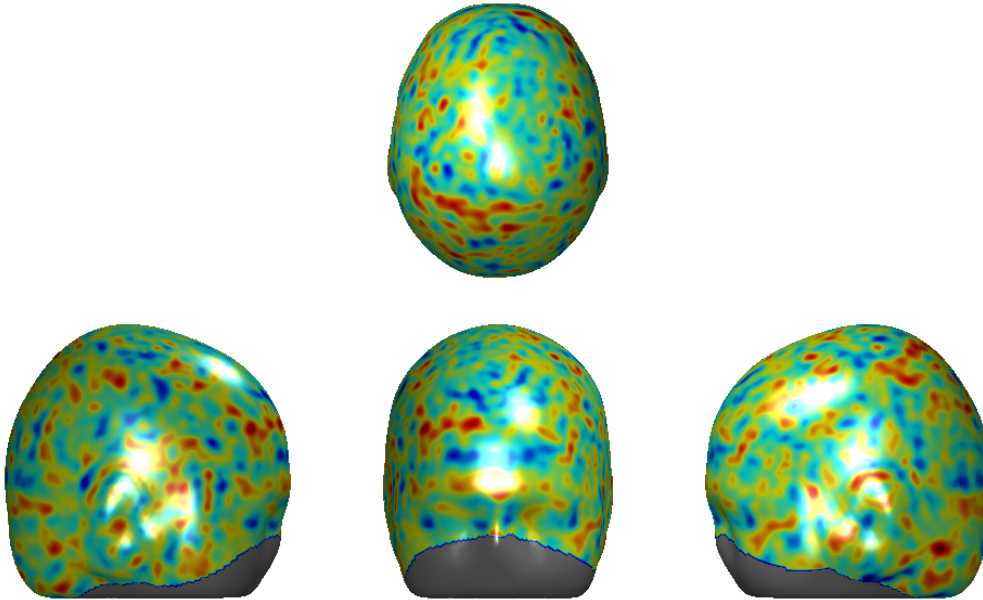

Supplementary Figure 10: Faculty X.

**Eventuality  
(Age completed education)**

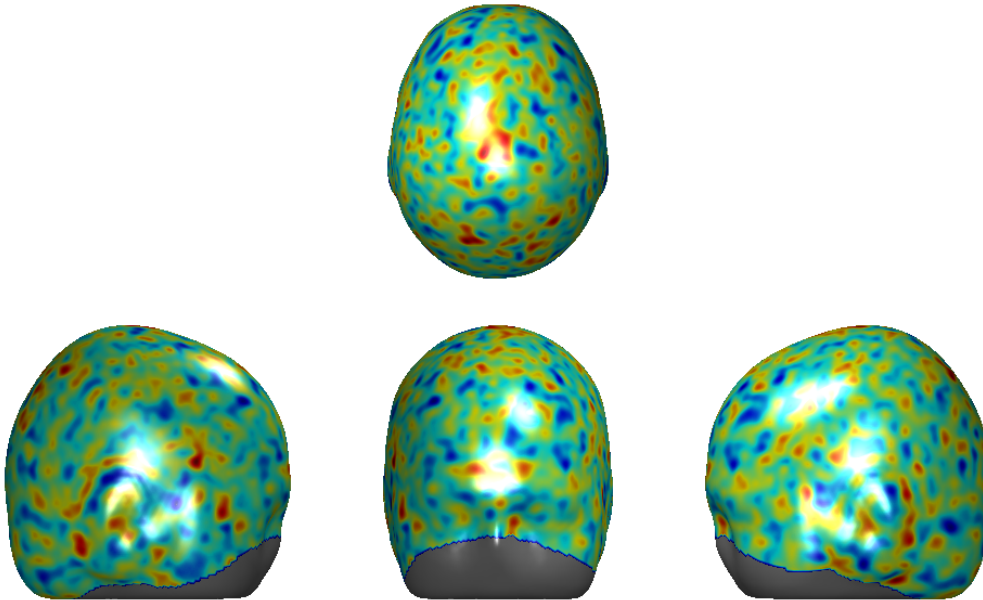

Supplementary Figure 11: Faculty XI.

**Locality**  
**(Hours spent exercising)**

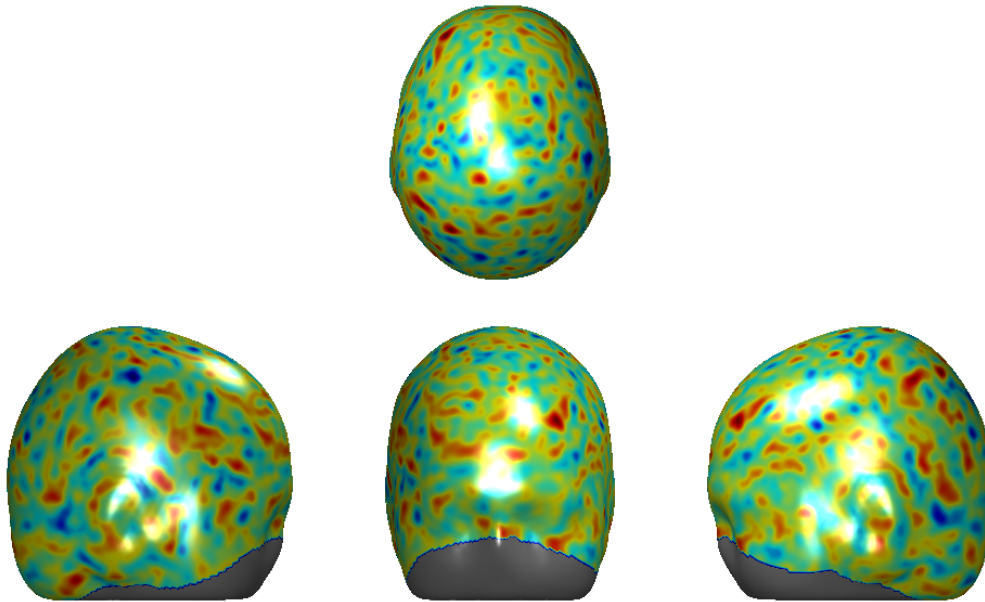

Supplementary Figure 12: Faculty XII.

**Words**  
**(Category fluency)**

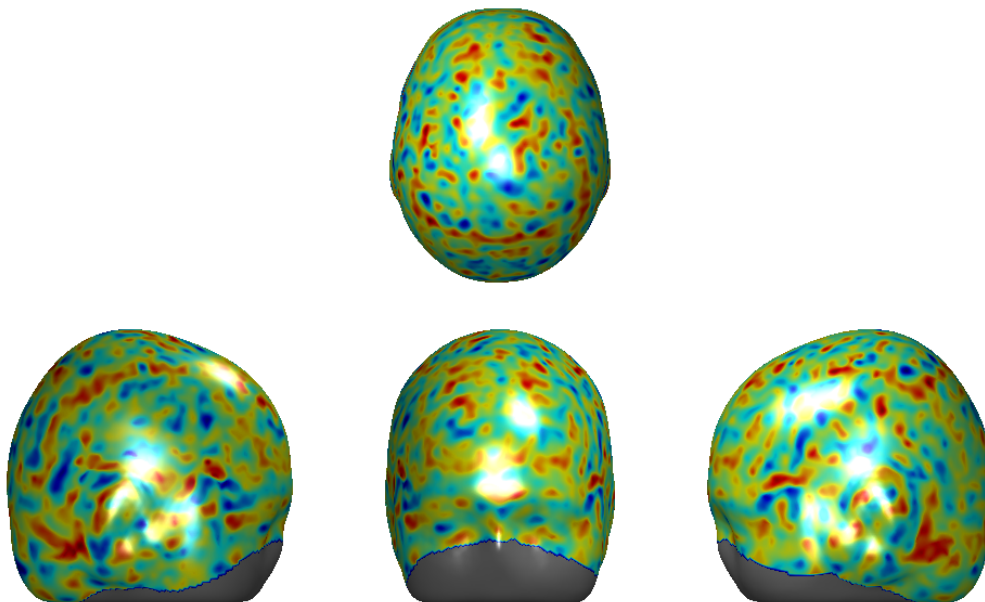

Supplementary Figure 13: Faculty XIV.

**Language  
(Author)**

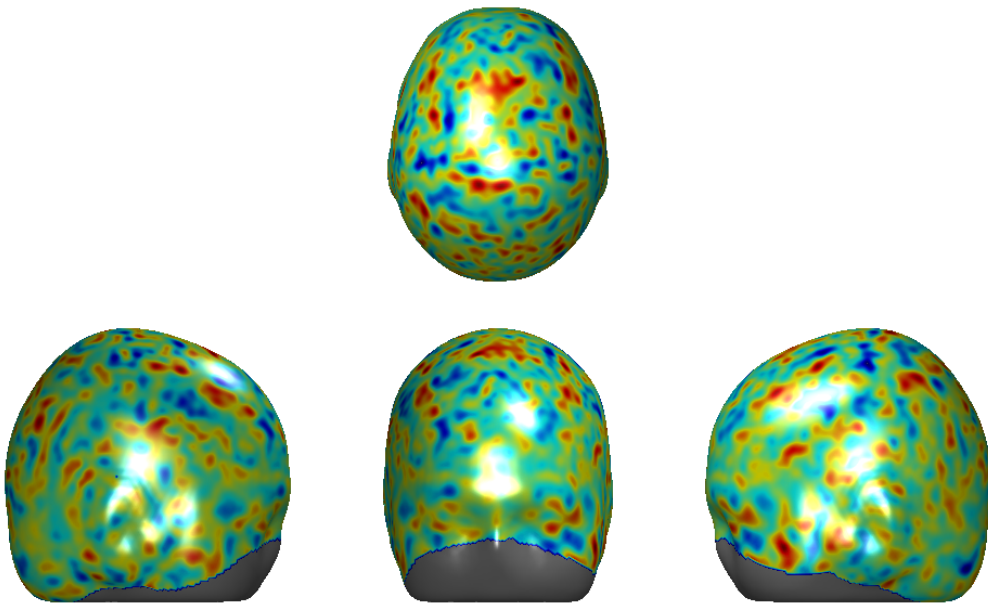

Supplementary Figure 14: Faculty XV.

**Colouring  
(Photographer)**

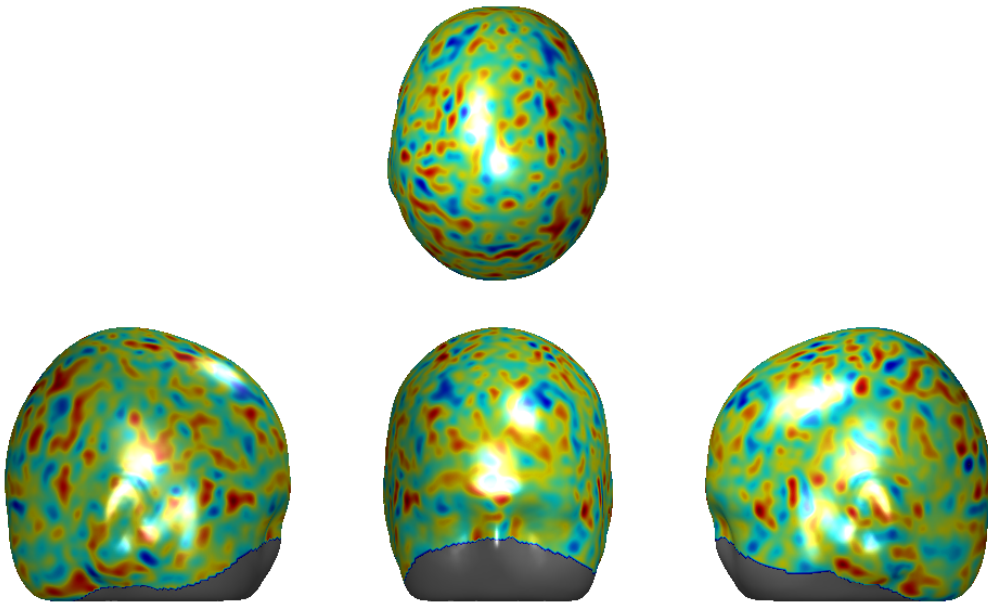

Supplementary Figure 15: Faculty XVI.

**Tune  
(Musician)**

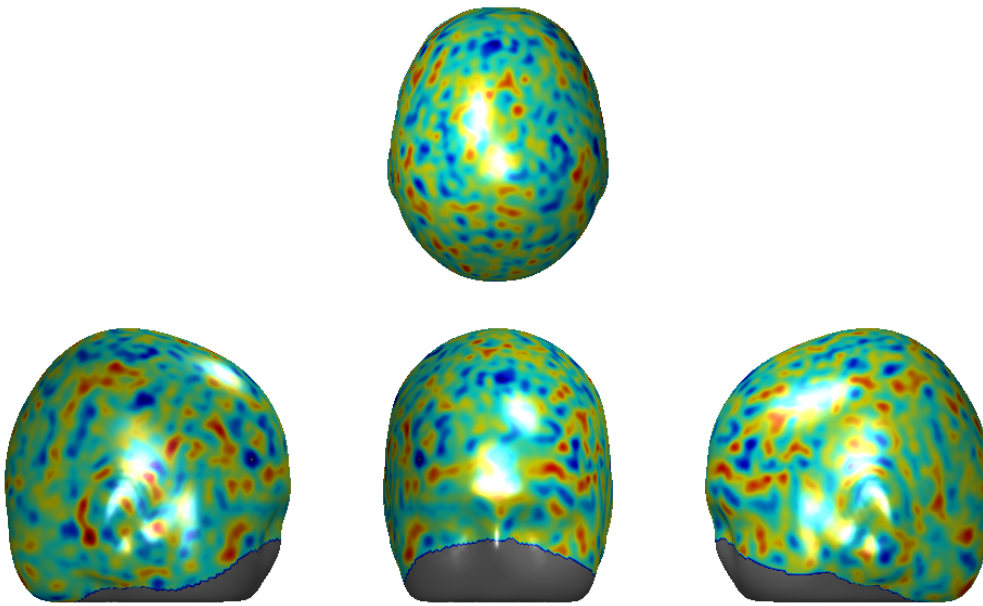

Supplementary Figure 16: Faculty XVII.

**Number  
(Mathematician)**

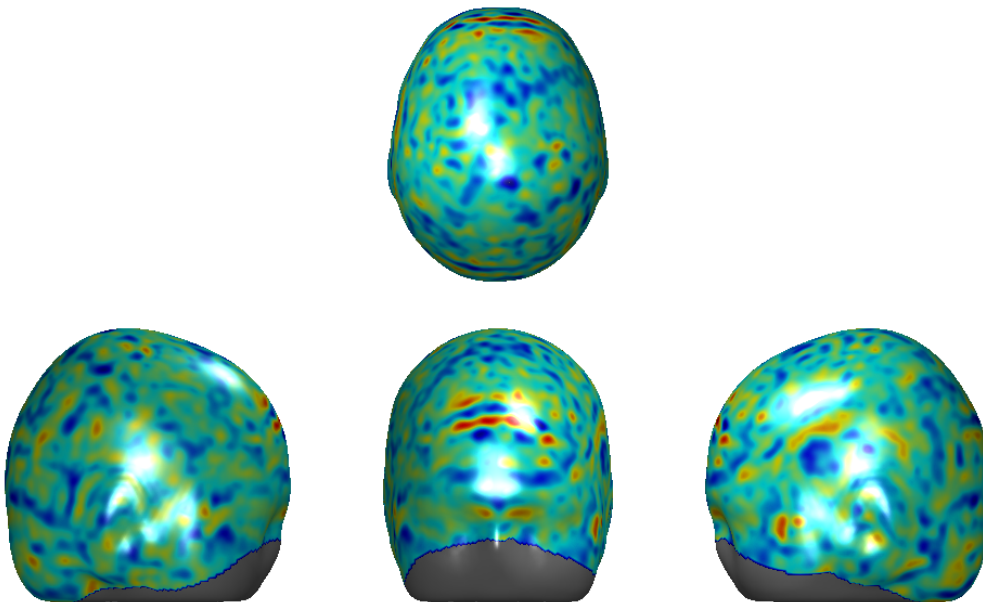

Supplementary Figure 17: Faculty XVIII.



**Constructiveness  
(Grip strength)**

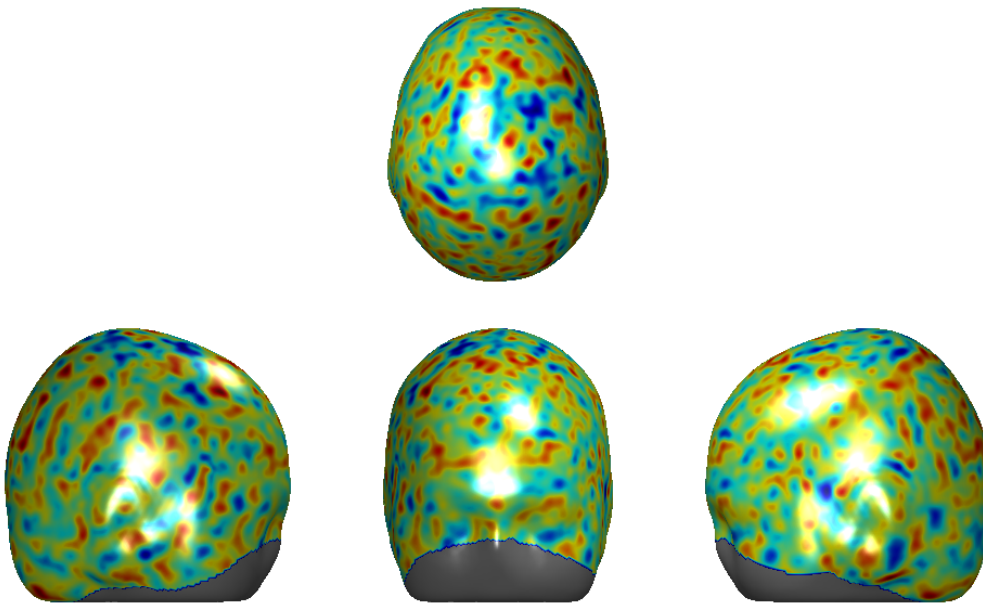

Supplementary Figure 18: Faculty XIX.

**Comparison  
(Concept interpolation)**

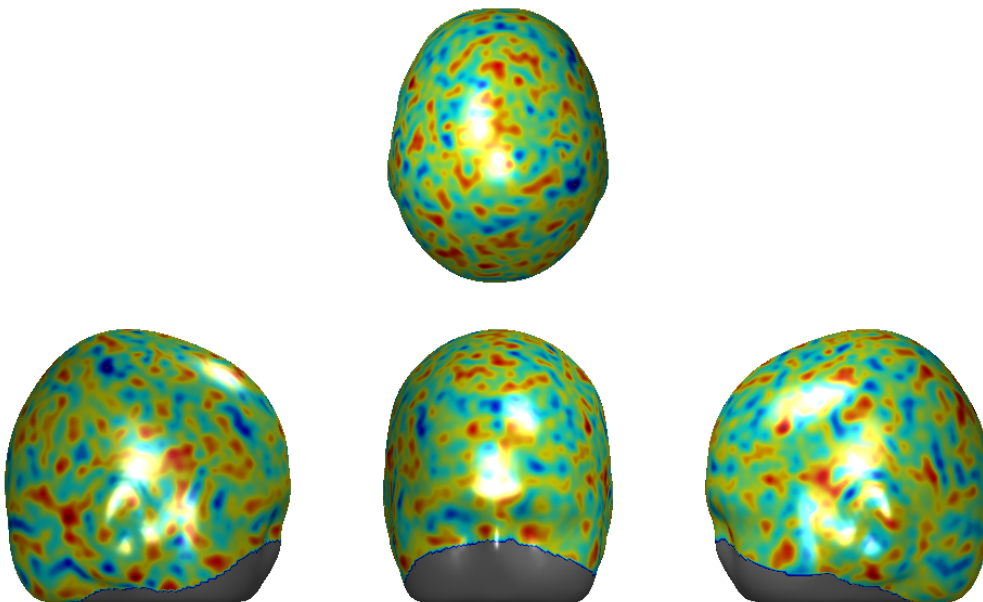

Supplementary Figure 19: Faculty XX.



**Causality  
(Clergy)**

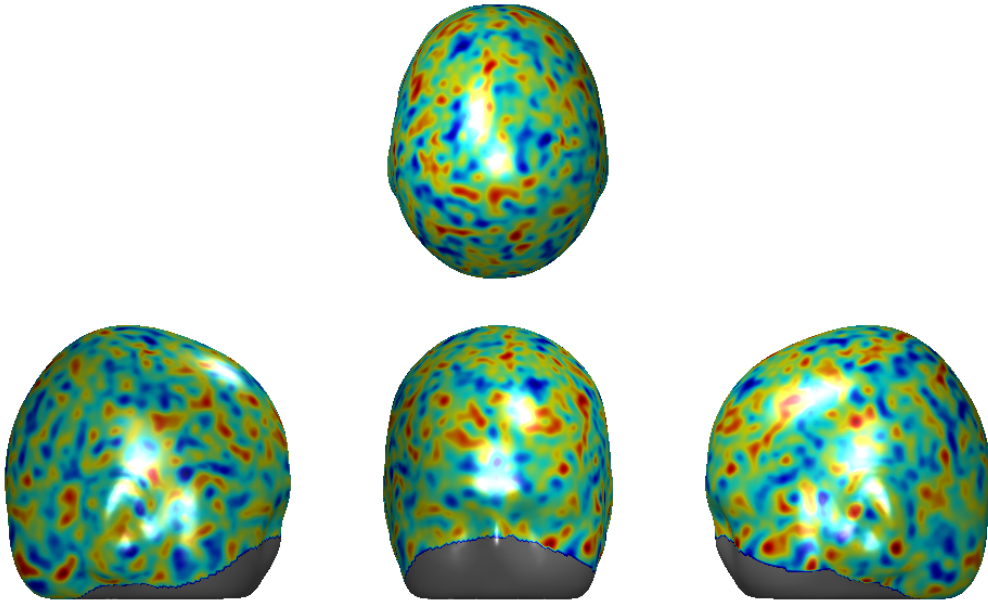

Supplementary Figure 20: Faculty XXI.

**Mirthfulness  
(Comedian)**

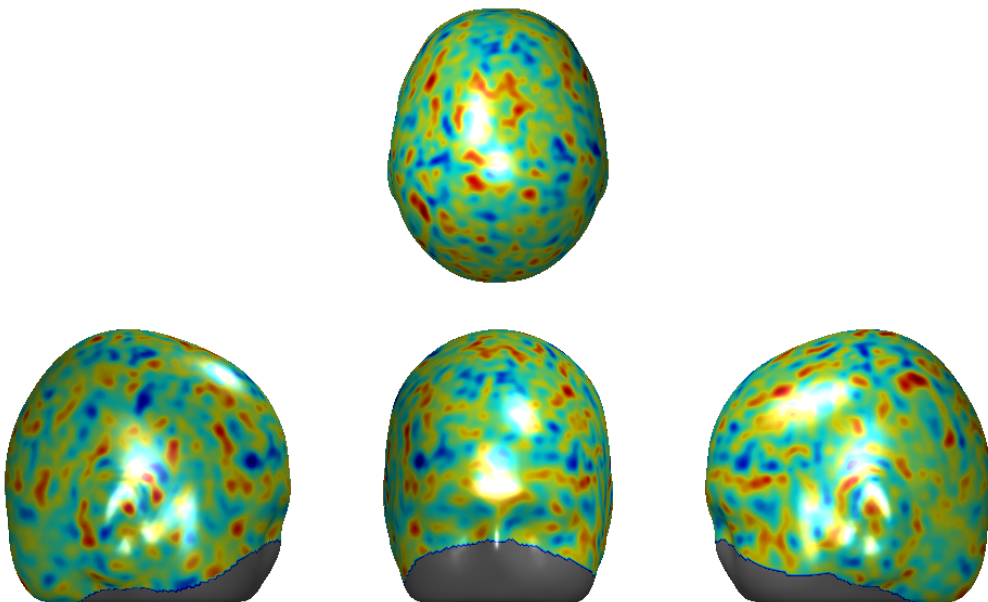

Supplementary Figure 21: Faculty XXII.

**Ideality  
(Poet)**

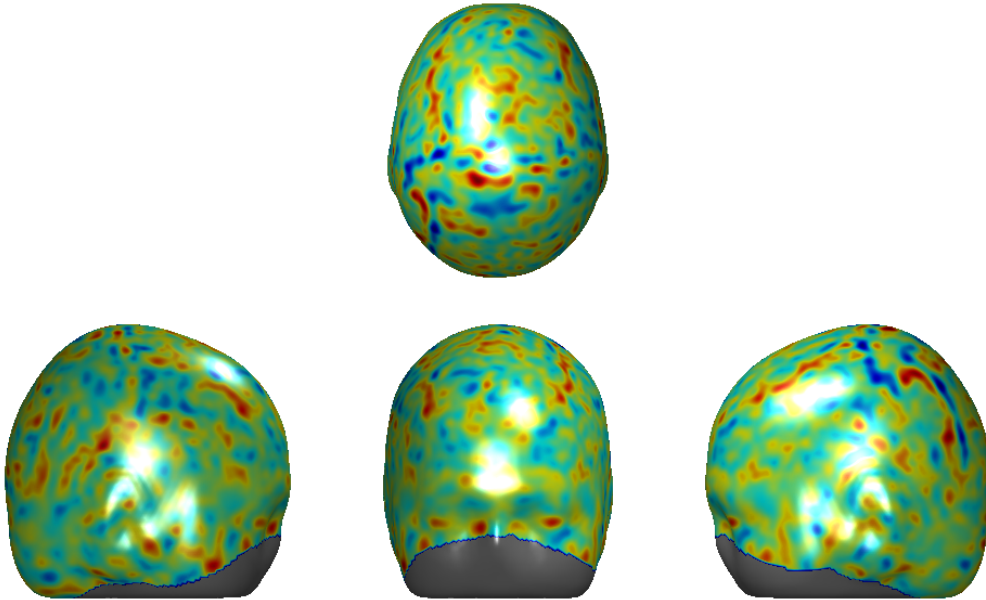

Supplementary Figure 22: Faculty XXIII.

**Benevolence  
(Charity)**

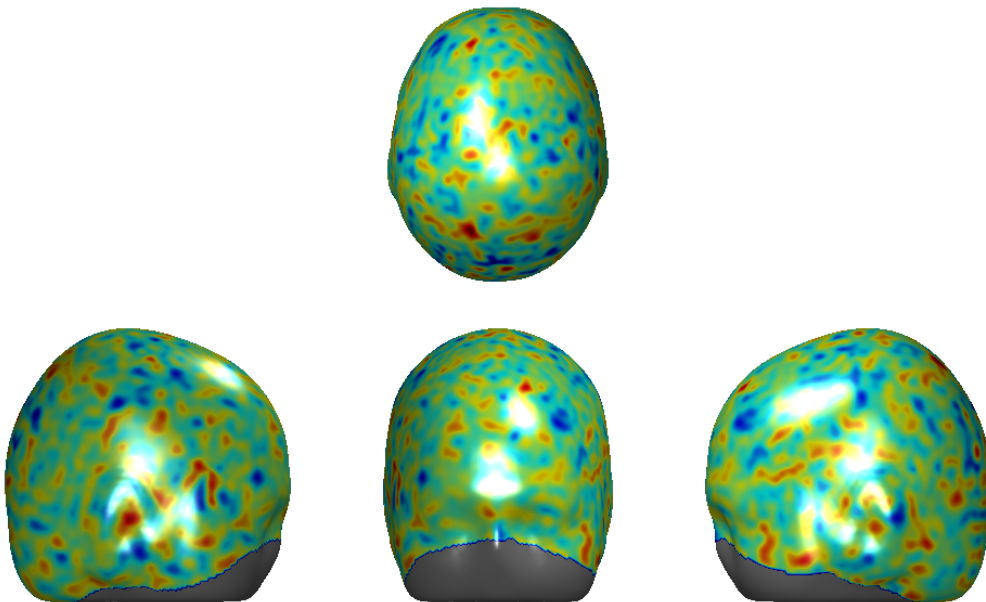

Supplementary Figure 23: Faculty XXIV.
